# Supplementary material for: Meta-Analyses of QTLs Associated with Protein and Oil Contents and Compositions in Soybean [Glycine max (L.) Merr.] Seed
Source: MDPI journal article supplement (doi:10.3390/ijms18061180), 2017-06-01
Supplement: s1 [file s1]

# Meta-analysis of QTL Associated with Protein and Oil Contents and Compositions in Soybean [*Glycine max* (L.) Merr.] Seed

Kyujung Van and Leah K. McHale \*

**Table S1.** List of references used for this study.

Showned in the suppletable excel.

**Table S2.** Number of collected QTLs and QTLs used for this study by trait.

| Trait          | No. of Collected QTLs | No. of QTLs Used for Meta-Analysis |           |
|----------------|-----------------------|------------------------------------|-----------|
|                |                       | All QTLs included                  | LOD > 2.0 |
| Protein        | 355                   | 184                                | 175       |
| Oil            | 367                   | 212                                | 205       |
| Amino acids    | 358                   | 156                                | 156       |
| Ala            | 15                    | 10                                 | 10        |
| Arg            | 12                    | 5                                  | 5         |
| Asp            | 14                    | 9                                  | 9         |
| Cys            | 34                    | 12                                 | 12        |
| Gln            | 7                     | 0                                  | 0         |
| Glu            | 8                     | 8                                  | 8         |
| Gly            | 12                    | 7                                  | 7         |
| His            | 9                     | 3                                  | 3         |
| Ile            | 14                    | 8                                  | 8         |
| Leu            | 18                    | 9                                  | 9         |
| Lys            | 26                    | 5                                  | 5         |
| Met            | 38                    | 12                                 | 12        |
| Phe            | 17                    | 9                                  | 9         |
| Pro            | 15                    | 9                                  | 9         |
| Ser            | 15                    | 11                                 | 11        |
| Thr            | 39                    | 13                                 | 13        |
| Trp            | 31                    | 9                                  | 9         |
| Tyr            | 17                    | 9                                  | 9         |
| Val            | 17                    | 8                                  | 8         |
| Fatty acids    | 240                   | 120                                | 113       |
| Linoleic acid  | 45                    | 21                                 | 19        |
| Linolenic acid | 74                    | 39                                 | 37        |
| Oleic acid     | 46                    | 21                                 | 21        |
| Palmitic acid  | 45                    | 22                                 | 19        |
| Stearic acid   | 30                    | 17                                 | 17        |
| Total          | 1,320                 | 672                                | 649       |

**Table S3.** The best meta-QTL models by chromosomes and traits.

| Chr          | Linkage Group | The Best Meta-QTL Models <sup>a</sup> |           |                |                |    |    |                |                  |                                                       |
|--------------|---------------|---------------------------------------|-----------|----------------|----------------|----|----|----------------|------------------|-------------------------------------------------------|
|              |               | No. of Projected QTLs                 |           |                |                |    |    |                |                  |                                                       |
|              |               | All QTLs                              | LOD > 2.0 | Protein        | Oil            | AA | FA | Protein+Oil    | Protein +Cys+Met | Misc. Information                                     |
| 1            | D1a           | 4                                     | 4         | - <sup>b</sup> | 1              | -  | -  | 1              | -                | No projected protein QTL,<br>1 projected AA QTL (Thr) |
| 2            | D1b           | 14                                    | 12        | 4              | -              | -  | 3  | 3              | -                | No projected AA QTL                                   |
| 3            | N             | 14                                    | 14        | 3              | 3              | -  | 2  | 4 <sup>c</sup> | -                | No projected AA QTL                                   |
| 4            | C1            | 8                                     | 8         | 5              | 2              | -  | -  | 4              | -                | No projected AA & FA QTL                              |
| 5            | A1            | 20                                    | 20        | 4              | 4              | -  | 3  | 5 <sup>c</sup> | -                | No projected AA QTL                                   |
| 6            | C2            | 26                                    | 26        | 4              | 5              | -  | 2  | 6 <sup>c</sup> | 4                | Only 1 projected QTL (Met)                            |
| 7            | M             | 12                                    | 12        | 3              | 5              | -  | -  | 6 <sup>c</sup> | -                | 1 FA QTL, No projected AA QTL                         |
| 8            | A2            | 5                                     | 5         | 1              | 2              | -  | -  | 2              | -                | 1 projected AA QTL (Lys)                              |
| 9            | K             | 17                                    | 14        | 2              | 3              | 1  | 3  | 3 <sup>d</sup> | 3                | 2 projected AA QTL (Met & Thr)                        |
| 10           | O             | 12                                    | 12        | 2              | 4              | -  | 3  | 3              | -                | No projected AA QTL                                   |
| 11           | B1            | 3                                     | 3         | 2              | -              | -  | -  | 3              | -                | 2 projected protein QTLs,<br>1 projected oil QTL only |
| 12           | H             | 6                                     | 6         | -              | 3              | -  | 1  | 2              | -                | 1 protein QTL,<br>No projected AA QTL                 |
| 13           | F             | 15                                    | 14        | 4              | 3              | -  | 3  | 4              | -                | No projected AA QTL                                   |
| 14           | B2            | 16                                    | 14        | 3              | 2              | -  | 2  | 3 <sup>d</sup> | -                | No projected AA QTL                                   |
| 15           | E             | 21                                    | 16        | 3              | 3              | -  | 3  | 5 <sup>d</sup> | -                | No projected AA QTL                                   |
| 16           | J             | 5                                     | 4         | -              | -              | -  | 2  | -              | -                | Projected FA QTLs only                                |
| 17           | D2            | 13                                    | 11        | 2              | 3              | -  | 3  | 3              | -                | No projected AA QTL                                   |
| 18           | G             | 18                                    | 17        | 4              | 3              | -  | 5  | 5              | -                | No projected AA QTL                                   |
| 19           | L             | 17                                    | 16        | 4              | 5              | -  | 2  | 5 <sup>c</sup> | -                | No projected AA QTL                                   |
| 20           | I             | 38                                    | 35        | 4 <sup>c</sup> | 5 <sup>c</sup> | 5  | 1  | 4 <sup>c</sup> | 4 <sup>c</sup>   | 5 projected AA QTLs                                   |
| <b>Total</b> |               | 284                                   | 263       |                |                |    |    |                |                  |                                                       |

<sup>a</sup> BioMercator v4.2 evaluated all meta-QTL models (1 to  $n$ ), where  $n$  is the total number of QTLs identified in each QTL cluster and suggested the best model by each chromosome and traits. <sup>b</sup> No model was suggested by meta-QTL (Meta-analysis 1 of 2, [44]) because no or few QTLs corresponding to the trait were projected on the chromosome. <sup>c</sup> The most likely meta-QTL model given position and confidence interval by meta-QTL (Meta-analysis 2 of 2, [44]), if all collected QTLs or QTLs with LOD scores > 2.0 were used for meta-analysis. <sup>d</sup> The most likely meta-QTL model given position and confidence interval by meta-QTL, if only QTLs with LOD scores > 2.0 were used for meta-analysis.

**Table S4.** The most appropriate meta-QTL models for various traits suggested by five criteria.

| Chr <sup>a</sup> | Linkage<br>group | The best model (K) <sup>b</sup> and values by model selection criteria |        |                   |        |                   |        |                  |        |                  |        |
|------------------|------------------|------------------------------------------------------------------------|--------|-------------------|--------|-------------------|--------|------------------|--------|------------------|--------|
|                  |                  | AIC <sup>c</sup>                                                       |        | AICc <sup>d</sup> |        | AIC3 <sup>e</sup> |        | BIC <sup>f</sup> |        | AWE <sup>g</sup> |        |
|                  |                  | K                                                                      | Value  | K                 | Value  | K                 | Value  | K                | Value  | K                | Value  |
| Protein only     |                  |                                                                        |        |                   |        |                   |        |                  |        |                  |        |
| 20               | I                | 4                                                                      | 93.79  | 3                 | 102.46 | 4                 | 100.79 | 4                | 98.75  | 3                | 99.96  |
| Oil only         |                  |                                                                        |        |                   |        |                   |        |                  |        |                  |        |
| 20               | I                | 5                                                                      | 103.37 | 4                 | 126.35 | 4                 | 110.95 | 4                | 107.91 | 4                | 117.46 |
| Protein+Oil      |                  |                                                                        |        |                   |        |                   |        |                  |        |                  |        |
| 3                | N                | 4                                                                      | 80.53  | 3                 | 102.50 | 4                 | 87.53  | 4                | 83.31  | 4                | 96.31  |
| 5                | A1               | 5                                                                      | 93.08  | 4                 | 121.24 | 4                 | 100.24 | 4                | 96.63  | 4                | 106.26 |
| 6                | C2               | 6                                                                      | 123.67 | 5                 | 205.97 | 6                 | 134.67 | 6                | 131.46 | 6                | 143.29 |
| 7                | M                | 6                                                                      | 89.50  | 4                 | 149.72 | 5                 | 98.90  | 5                | 93.48  | 5                | 113.72 |
| 9 <sup>h</sup>   | K                | 4                                                                      | 78.92  | 3                 | 112.22 | 4                 | 85.92  | 4                | 81.70  | 4                | 99.17  |
| 14 <sup>h</sup>  | B2               | 3                                                                      | 76.70  | 2                 | 87.41  | 3                 | 81.70  | 3                | 78.69  | 3                | 87.59  |
| 15 <sup>h</sup>  | E                | 5                                                                      | 108.41 | 5                 | 144.41 | 5                 | 117.41 | 5                | 114.79 | 5                | 123.98 |
| 19               | L                | 5                                                                      | 110.71 | 4                 | 156.39 | 5                 | 119.71 | 5                | 115.07 | 5                | 128.65 |
| 20               | I                | 4                                                                      | 229.11 | 3                 | 234.41 | 4                 | 236.11 | 3                | 238.34 | 3                | 217.74 |
| Protein+Cys+Met  |                  |                                                                        |        |                   |        |                   |        |                  |        |                  |        |
| 20               | I                | 4                                                                      | 134.03 | 4                 | 145.23 | 4                 | 141.03 | 4                | 140.27 | 4                | 139.88 |

<sup>a</sup> Chromosomes (Chrs) having successfully positioned meta-QTLs were only shown in this table. <sup>b</sup> BioMercator v4.2 evaluated all meta-QTL models (1 to *n*), where *n* is the total number of QTLs identified in each QTL cluster and suggested the best model by each chromosome. <sup>c</sup> AIC: Akaike information criterion. <sup>d</sup> AICc and AIC3: corrected Akaike information criterion. <sup>e</sup> BIC: Bayesian information criterion. <sup>f</sup> AWE: Approximate weight of evidence. <sup>g</sup> The most likely meta-QTL model given position and confidence interval by meta-QTL, if only QTLs with LOD > 2.0 were used for meta-analysis.

**Table S5.** Detailed information of candidate genes from each meta-QTL (< 50 candidate genes) obtained from SoyBase (available online: <http://soybase.org>) and Phytozome v12.0 (available online: <http://www.phytozome.net>).

Showed in the suppletable excel.
